# Supplementary material for: Normative Data for the D-KEFS Color-Word Interference and Trail Making Tests Adapted in Greek Adult Population 20–49 Years Old
Source: Preprints.org preprint supplement (doi:10.20944/preprints202409.0024.v1), 2024-09-02
Supplement: Supplementary file 1 [file supplementary]

| **Table 4**  *Norms for the Trail Making Test (TMT) in conditions 1 to 5 in adults aged 30-39 years old* | | | | | | | | | | | | | | | |
| --- | --- | --- | --- | --- | --- | --- | --- | --- | --- | --- | --- | --- | --- | --- | --- |
|  | TM1 | TM2 | TM3 | TM4 | TM5 | TM1 | TM2 | TM3 | TM4 | TM5 | TM1 | TM2 | TM3 | TM4 | TM5 |
| %ile 10-12 years of education (Education-Class 1) 13-16 years of education (Education-Class 2) 16< (Education-Class 3) | | | | | | | | | | | | | | | |
| 95 | 20.00 | 19.00 | 27.00 | 65.00 | 31.00 | 16.00 | 15.00 | 19.00 | 53.00 | 20.00 | 15.00 | 14.00 | 18.00 | 45.00 | 16.00 |
| 90 | 20.00 | 19.00 | 27.00 | 65.00 | 31.00 | 16.00 | 15.70 | 19.60 | 54.80 | 25.40 | 15.80 | 15.60 | 18.40 | 47.80 | 17.20 |
| 75 | 20.00 | 19.00 | 27.00 | 65.00 | 31.00 | 17.00 | 22.00 | 23.00 | 61.00 | 35.00 | 17.00 | 19.00 | 23.00 | 55.50 | 24.50 |
| 50 | 23.00 | 27.00 | 30.00 | 103.00 | 40.00 | 19.00 | 27.00 | 33.00 | 69.00 | 39.00 | 20.00 | 23.00 | 26.00 | 60.00 | 33.00 |
| 25 | - | - | - | - | - | 23.00 | 40.00 | 51.00 | 80.00 | 45.00 | 25.50 | 29.50 | 31.50 | 74.00 | 45.00 |
| 10 | - | - | - | - | - | 27.20 | 46.60 | 63.60 | 140.0 | 64.00 | 27.60 | 32.80 | 38.60 | 87.60 | 54.40 |
| Mean | 23.00 | 27.00 | 29.33 | 91.67 | 43.33 | 20.00 | 29.53 | 37.67 | 79.20 | 40.80 | 21.38 | 24.15 | 27.00 | 64.77 | 34.54 |
| S.D. | 2.12 | 8.00 | 2.08 | 23.18 | 14.29 | 3.91 | 11.09 | 15.71 | 29.15 | 11.74 | 4.53 | 5.95 | 6.50 | 13.31 | 13.54 |
| *Notes: M=Mean score, SD=Standard Deviation*, TMT1= Visual scanning, ΤΜΤ2=Number sequencing, ΤΜΤ3=Letter sequencing=, ΤΜΤ4= Number-Letter Switching, ΤΜΤ5=Motor speed | | | | | | | | | | | | | | | |

| **Table 2**  *Demographic distribution of the sample* | | | | |
| --- | --- | --- | --- | --- |
| Age groups | | | | Total |
| Age group 20-29 Age group 30-39 Age group 40-49 | | | | |
| Years of education  20-29  30-39  40-50 | | | | |
| 10-12 - 15 15 30  3  9  30 | | | | |
| 13-16 19 11 10 40  32  15  13  60 | | | | |
| 16+ | 11 | 11 | 10 | 31 |

| **Table 3**  *Norms for the Trail Making Test (TMT) in conditions 1 to 5 in adults aged 20-29 years old* | | | | | | | | | | |
| --- | --- | --- | --- | --- | --- | --- | --- | --- | --- | --- |
|  | ΤΜΤ1 | ΤΜΤ2 | ΤΜΤ3 | ΤΜΤ4 | ΤΜΤ5 | TMT1 | TMT2 | TMT3 | TMT4 | TMT5 |
| %ile 13-16 years of education (Education-Class 2)16< years of education (Education-Class 3) | | | | | | | | | | |
| 95 | 12.25 | 17.60 | 18.30 | 42.95 | 16.85 | 17.00 | 21.00 | 25.00 | 50.00 | 20.00 |
| 90 | 13.00 | 19.30 | 20.60 | 46.60 | 21.30 | 17.00 | 21.00 | 25.00 | 50.00 | 20.00 |
| 75 | 15.00 | 20.25 | 25.25 | 57.00 | 28.25 | 17.75 | 22.50 | 25.75 | 51.50 | 20.75 |
| 50 | 19.50 | 25.00 | 29.50 | 68.50 | 36.00 | 21.00 | 27.00 | 27.50 | 59.50 | 25.00 |
| 25 | 24.00 | 29.00 | 34.75 | 73.75 | 45.50 | 22.25 | 28.00 | 33.25 | 72.00 | 29.25 |
| 10 | 29.80 | 34.10 | 39.70 | 93.40 | 49.70 | - | - | - | - | - |
| M. | 20.47 | 25.31 | 30.34 | 67.94 | 36.00 | 20.33 | 25.67 | 28.83 | 61.17 | 25.00 |
| S.D. | 6.77 | 5.49 | 8.06 | 15.89 | 11.70 | 2.42 | 2.94 | 3.86 | 10.02 | 4.05 |
| *Notes:* M=Mean score, SD=Standard Deviation, TMT1= Visual scanning, ΤΜΤ2=Number sequencing, ΤΜΤ3=Letter sequencing=, ΤΜΤ4= Number-Letter Switching, ΤΜΤ5=Motor speed | | | | | | | | | | |

| **Table 5**  *Norms for the Trail Making Test (TMT) in conditions 1 to 5 in adults aged 40-49 years old* | | | | | | | | | | | | | | |  |
| --- | --- | --- | --- | --- | --- | --- | --- | --- | --- | --- | --- | --- | --- | --- | --- |
|  | TM1 | TM2 | TM3 | TM4 | TM5 | TM1 | TM2 | TM3 | TM4 | TM5 | TM1 | TM2 | TM3 | TM4 | TM5 | |
| %ile 10-12 years of education (Education-Class 1) 13-16 years of education (Education-Class 2) 16< (Education-Class 3) | | | | | | | | | | | | | | | | |
| 95 | 15.00 | 18.00 | 20.00 | 40.00 | 27.00 | 14.00 | 22.00 | 23.00 | 51.00 | 14.00 | 18.00 | 23.00 | 27.00 | 69.00 | 24.00 | |
| 90 | 15.00 | 18.00 | 20.00 | 40.00 | 27.00 | 14.40 | 22.40 | 25.00 | 55.80 | 15.20 | 18.00 | 23.00 | 27.00 | 69.00 | 24.00 | |
| 75 | 20.00 | 24.00 | 26.50 | 84.00 | 33.50 | 17.50 | 24.00 | 28.50 | 70.00 | 29.50 | 19.00 | 24.00 | 29.50 | 75.75 | 31.50 | |
| 50 | 23.00 | 30.00 | 42.00 | 107.0 | 45.00 | 19.00 | 29.00 | 33.00 | 73.00 | 40.00 | 20.50 | 27.50 | 34.50 | 87.00 | 38.50 | |
| 25 | 27.50 | 39.00 | 44.00 | 138.0 | 71.00 | 23.50 | 34.00 | 40.00 | 84.50 | 48.50 | 24.25 | 32.25 | 48.25 | 97.50 | 42.25 | |
| 10 | - | - | - | - | - | 28.80 | 39.20 | 53.00 | 133.8 | 69.00 | - | - | - | - | - | |
| Mean | 23.78 | 31.78 | 36.22 | 106.6 | 50.89 | 20.38 | 29.69 | 35.23 | 80.23 | 40.08 | 21.63 | 27.88 | 38.25 | 86.63 | 37.75 | |
| S.D. | 6.07 | 10.15 | 10.37 | 36.25 | 20.15 | 4.646 | 5.83 | 9.38 | 26.84 | 16.36 | 3.70 | 4.19 | 10.75 | 11.55 | 8.36 | |
| *Notes: M=Mean score, SD=Standard Deviation*,TMT1= Visual scanning, ΤΜΤ2=Number sequencing, ΤΜΤ3=Letter sequencing=, ΤΜΤ4= Number-Letter Switching, ΤΜΤ5=Motor speed | | | | | | | | | | | | | | | | |

| **Table 6** | | | | | | | | | | | | |
| --- | --- | --- | --- | --- | --- | --- | --- | --- | --- | --- | --- | --- |
|  | | | | | | | | | | | | |
| *Norms for the Color-Word Interference (CWIT) in conditions 1 to 4 in adults aged 20-49 years old* | | | | | | | | | | | | |
|  | | | | | | | | | | | | |
|  | Age group 20-29 | | | | Age group 30-39 | | | | Age group 40-49 | | | |
| %ile | CWIT1 | CWIT2 | CWIT3 | CWIT4 | CWIT1 | CWIT2 | CWIT3 | CWIT4 | CWIT1 | CWIT2 | CWIT3 | CWIT4 |
| 95 | 21.00 | 16.05 | 33.05 | 39.05 | 16.10 | 16.10 | 31.65 | 44.00 | 20.55 | 16.55 | 37.75 | 47.75 |
| 90 | 21.20 | 17.00 | 35.10 | 43.00 | 20.00 | 17.10 | 37.30 | 48.10 | 21.20 | 17.10 | 42.30 | 52.00 |
| 75 | 24.00 | 18.00 | 37.00 | 47.00 | 24.00 | 19.00 | 44.75 | 52.75 | 24.75 | 19.00 | 49.75 | 56.75 |
| 50 | 25.00 | 20.00 | 41.00 | 51.50 | 25.00 | 20.00 | 49.50 | 60.00 | 25.00 | 21.00 | 56.00 | 64.00 |
| 25 | 29.75 | 22.00 | 50.00 | 57.00 | 29.00 | 21.25 | 57.75 | 68.25 | 30.00 | 23.25 | 62.00 | 70.00 |
| 10 | 30.90 | 23.90 | 59.80 | 63.60 | 30.90 | 22.90 | 60.90 | 80.00 | 31.90 | 26.00 | 65.00 | 80.00 |
| Μ. | 26.28 | 20.15 | 44.25 | 52 | 25.70 | 20.13 | 50.27 | 60.77 | 26.43 | 21.40 | 55.43 | 64.47 |
| S.D | 3.78 | 2.66 | 9.44 | 8 | 4.24 | 2 | 9 | 10.45 | 3.67 | 3.26 | 8.44 | 9.89 |

*Notes:* M= Mean score, SD= Standard Deviation, CWIT1= Color naming, CWIT2= Word reading, CWIT3= Inhibition, CWIT4= Inhibition/Switching

| **Table 7** | | | | |  | | | |
| --- | --- | --- | --- | --- | --- | --- | --- | --- |
|  | | | | | | | | |
| *Norms for the Color-Word Interference (CWIT) for the CWIT1 in Errors (Total score, Corrected and Non Corrected) in adults aged 20-49 years old* | | | | | | | | |
|  | | | | | | | | |
|  | Age group 20-29 | | | | Age group 30-39 Age group 40-49 | | | |
| %ile | Uncorr | Corrected | Total | Uncorr | Corrected | Total | Uncorr | Corrected Total |
| 95 | 00.00 | 00.00 | 00.00 | 00.00 | 00.00 | 00.00 | 00.00 | 00.00 00.00 |
| 90 | 00.00 | 00.00 | 00.00 | 00.00 | 00.90 | 00.90 | 00.00 | 00.90 00.90 |
| 75 | 00.00 | 00.00 | 00.00 | 00.00 | 00.00 | 00.00 | 00.00 | 00.00 00.00 |
| 50 | 00.00 | 00.00 | 00.00 | 00.00 | 00.00 | 00.00 | 00.00 | 00.00 00.00 |
| 25 | 00.00 | 00.00 | 00.00 | 00.00 | 00.00 | 00.00 | 00.00 | 00.00 00.00 |
| 10 | 00.00 | 00.00 | 00.00 | 00.00 | 00.90 | 00.90 | 00.00 | 00.90 00.90 |
| Μ | 00.00 | 00.05 | 00.05 | 00.00 | 00.10 | 00.10 | 00.00 | 00.10 00.10 |
| S.D | 00.00 | 00.22 | 00.22 | 00.00 | 00.30 | 00.30 | 00.00 | 00.30 00.30 |

*Notes:* M= Mean score, SD= Standard Deviation, CWIT2= Word reading, Uncorr= Uncorrected errors, Corrected= Corrected errors, Total= Total errors

| **Table 8** | | | | |  | | | |
| --- | --- | --- | --- | --- | --- | --- | --- | --- |
|  | | | | |  | | | |
| *Norms for the Color-Word Interference (CWIT) for the CWIT2 in Errors (Total score, Corrected and Non Corrected) in adults aged 20-49 years old* | | | | | | | | |
|  | | | | | | | | |
|  | Age group 20-29 | | | | Age group 30-39 Age group 40-49 | | | |
| %ile | Uncorr | Corrected | Total | Uncorr | Corrected | Total | Uncorr | Corrected Total |
| 95 | 00.00 | 00.45 | 00.00 | 00.00 | 00.00 | 00.00 | 00.00 | 00.00 00.00 |
| 90 | 00.00 | 00.00 | 00.00 | 00.00 | 00.00 | 00.00 | 00.00 | 00.00 00.00 |
| 75 | 00.00 | 00.00 | 00.00 | 00.00 | 00.00 | 00.00 | 00.00 | 00.00 00.00 |
| 50 | 00.00 | 00.00 | 00.00 | 00.00 | 00.00 | 00.00 | 00.00 | 00.00 00.00 |
| 25 | 00.00 | 00.00 | 00.00 | 00.00 | 00.00 | 00.00 | 00.00 | 00.00 00.00 |
| 10 | 00.00 | 00.00 | 00.00 | 00.00 | 00.00 | 00.00 | 00.00 | 00.00 00.00 |
| Μ | 00.03 | 00.00 | 00.03 | 00.00 | 00.00 | 00.00 | 00.00 | 00.03 00.03 |
| S.D | 00.15 | 00.00 | 00.15 | 00.00 | 00.00 | 00.00 | 00.00 | 00.18 00.18 |

*Notes:* M= Mean score, SD= Standard Deviation, CWIT2= Color naming, Uncorr= Uncorrected errors, Corrected= Corrected errors, Total= Total errors

|  | | | | |  | | | |
| --- | --- | --- | --- | --- | --- | --- | --- | --- |
| **Table 9** | | | | |  | | | |
|  | | | | |  | | | |
| *Norms for the Color-Word Interference (CWIT) for the CWIT3 in Errors (Total score, Corrected and Non Corrected) in adults aged 20-49 years old* | | | | | | | | |
|  | | | | | | | | |
|  | Age group 20-29 | | | | Age group 30-39 Age group 40-49 | | | |
| %ile | Uncorr | Corrected | Total | Uncorr | Corrected | Total | Uncorr | Corrected Total |
| 95 | 0.00 | 0.00 | 0.00 | 0.00 | 0.00 | 0.00 | 0.00 | 0.00 0.00 |
| 90 | 0.90 | 0.00 | 0.00 | 0.00 | 0.00 | 0.00 | 0.00 | 0.00 0.00 |
| 75 | 0.00 | 0.00 | 0.00 | 0.00 | 1.00 | 1.00 | 0.00 | 1.00 1.00 |
| 50 | 0.00 | 1.00 | 1.00 | 0.00 | 1.00 | 1.00 | 0.00 | 1.25 2.25 |
| 25 | 0.00 | 2.90 | 3.00 | 0.00 | 2.00 | 0.00 | 1.00 | 3.00 3.00 |
| 10 | 1.00 | 3.00 | 3.95 | 0.45 | 2.00 | 0.00 | 2.45 | 3.00 3.45 |
| M | 0.10 | 0.73 | 0.83 | 0.03 | 0.73 | 0.77 | 0.23 | 0.93 1.17 |
| S.D | 0.30 | 1.08 | 1.23 | 0.18 | 0.69 | 0.67 | 0.67 | 1.04 1.28 |

*Notes:* M= Mean score, SD= Standard Deviation, CWIT3= Inhibition, Uncorr= Uncorrected errors, Corrected= Corrected errors, Total= Total errors

|  | | | | |  | | | |
| --- | --- | --- | --- | --- | --- | --- | --- | --- |
| **Table 10** | | | | |  | | | |
|  | | | | |  | | | |
| *Norms for the Color-Word Interference (CWIT) for the CWIT4 in Errors (Total score, Corrected and Non Corrected) in adults aged 20-49 years old* | | | | | | | | |
|  | | | | | | | | |
|  | Age group 20-29 | | | | Age group 30-39 Age group 40-49 | | | |
| %ile | Uncorr | Corrected | Total | Uncorr | Corrected | Total | Uncorr | Corrected Total |
| 95 | 0.00 | 0.00 | 0.00 | 0.00 | 0.00 | 0.00 | 0.00 | 0.00 0.00 |
| 90 | 0.00 | 0.00 | 0.10 | 0.00 | 0.00 | 0.00 | 0.00 | 0.00 0.00 |
| 75 | 0.00 | 1.00 | 1.00 | 0.00 | 0.00 | 0.00 | 0.00 | 0.00 1.00 |
| 50 | 0.00 | 1.00 | 2.00 | 0.00 | 1.00 | 1.00 | 1.00 | 1.00 2.00 |
| 25 | 1.00 | 2.00 | 3.00 | 1.00 | 2.00 | 3.00 | 2.00 | 2.00 4.00 |
| 10 | 2.90 | 3.00 | 4.00 | 1.00 | 3.00 | 3.90 | 3.00 | 3.00 5.90 |
| M | 0.78 | 1.40 | 2.15 | 0.40 | 1.13 | 1.53 | 1.27 | 1.27 2.53 |
| S.D | 1.09 | 1.00 | 1.47 | 0.56 | 1.13 | 1.38 | 1.28 | 1.11 1.97 |
| *Notes:* M= Mean score, SD= Standard Deviation, CWIT3= Inhibition, Uncorr= Uncorrected errors, Corrected= Corrected errors, Total= Total errors | | | | | | | | |

| **Table 11** | | | |
| --- | --- | --- | --- |
|  | | | |
| *Norms for the Composite Scaled-Score Equivalents of Scaled Scores by All age Groups* | | | |
|  | | | |
| %ile | Inhibition vs Color Naming | Inhibition/  Switching vs  Combined Naming + Reading | Inhibition/Switching vs Inhibition |
| 95 | 3.00 | 2.00 | 2.00 |
| 90 | 3.00 | 1.00 | 2.00 |
| 75 | 2.00 | 1.00 | 0.75 |
| 50 | 0.00 | -1.00 | -1.00 |
| 25 | -2.00 | -2.00 | -2.00 |
| 10 | -3.00 | -4.00 | -3.00 |
| M | -0.21 | -0.98 | -0.56 |
| S.D | 2.32 | 2.09 | 1.88 |
| *Notes:* M= Mean score, SD= Standard Deviation | | | |
